# Supplementary material
Source: Royal Society of Chemistry journal article supplement (doi:10.1039/d6ta01639a)
Supplement: d6ta01639a1.pdf [file d6ta01639a1.pdf]

## Supporting information for

### **Robust bamboo cellulose/phytic acid composite aerogels with thermal insulation, fire protection and acoustic absorption via ambient pressure drying**

Yunyan Zhu<sup>a,b</sup>, Sikui Chen<sup>a,b</sup>, Yingyang Luo<sup>a,b</sup>, Erhui Ren<sup>a,b,d</sup>, Hong Tang<sup>e</sup>, Ronghui Guo<sup>a,b,c\*</sup>

a. College of Biomass Science and Engineering, Sichuan University, Chengdu 610065, China

b. Ministry Education Key Lab Leather Chemistry & Engineering, Sichuan University, Chengdu 610065, Sichuan, China

c. Yibin Industrial Technology Research Institute of Sichuan University, Yibin, Sichuan, China

d. High-Tech Organic Fibers Key Laboratory of Sichuan Province, Chengdu, Sichuan, China

e. Materials Science and Engineering, College of Design and Engineering, National University of Singapore Blk EA, #03-09 9 Engineering Drive 1 Singapore 117575

#### **Content**

1. Supporting Figures
2. Supporting Tables
3. References

#### **1. Supporting Figures**

---

\*Corresponding Author. Ronghui Guo, E-mail address: ronghuiguo214@126.com

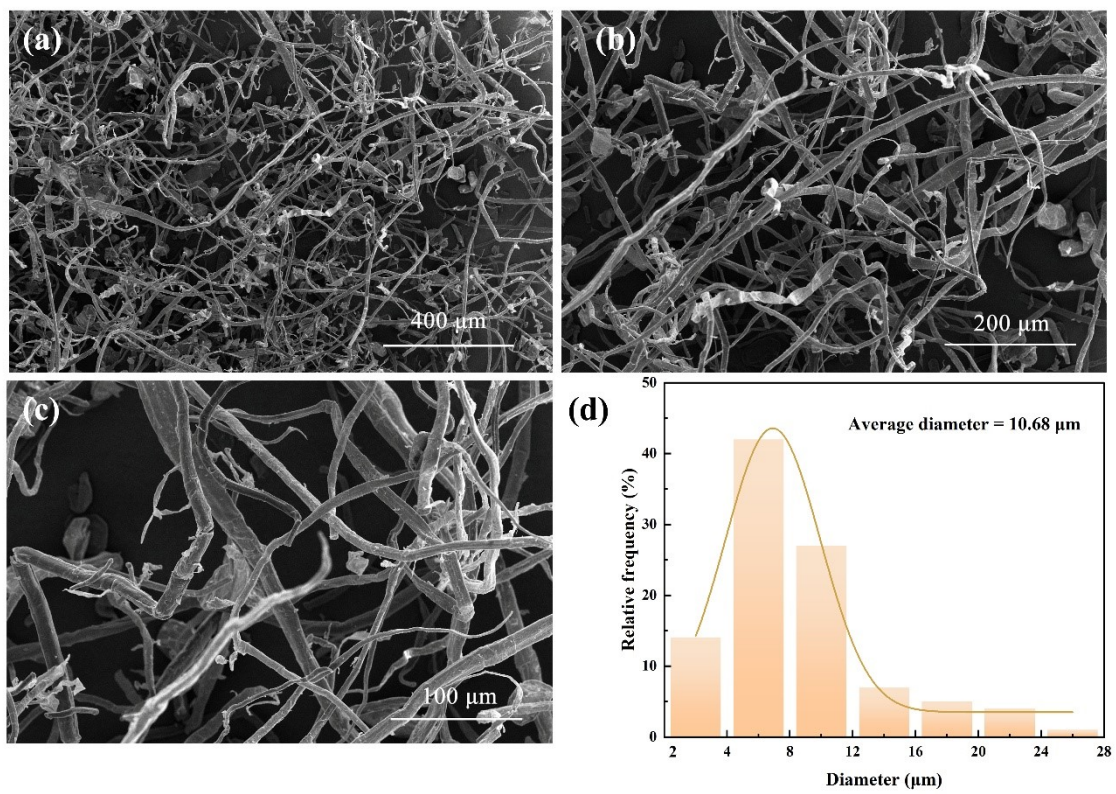

**Fig. S1** SEM images (a, b and c) and diameter distribution (d) of bamboo cellulose fibers.

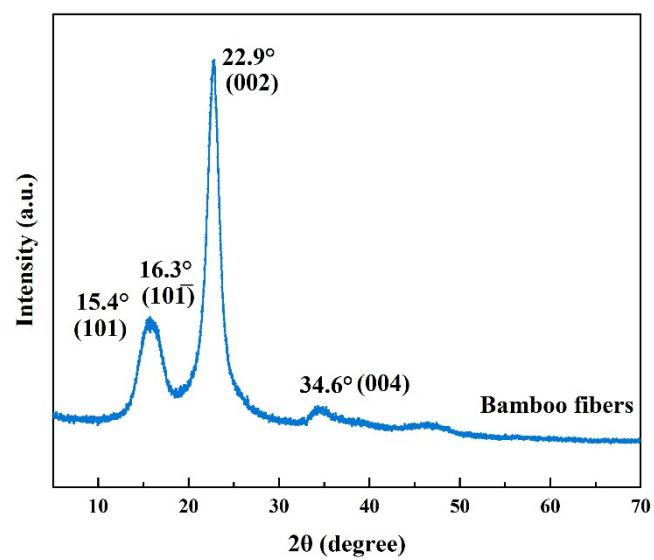

Fig. S2 XRD curve of bamboo cellulose fibers.

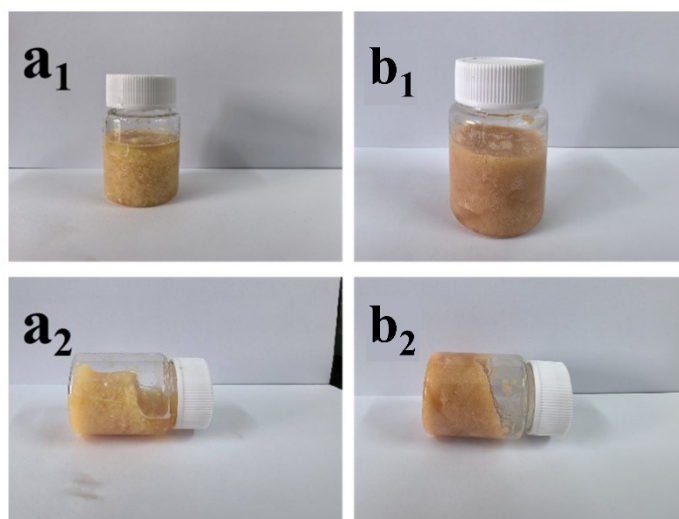

**Fig. S3** Digital photos of reaction slurry without CMC (a<sub>1</sub>, a<sub>2</sub>) and with CMC (b<sub>1</sub>, b<sub>2</sub>) before freeze molding.

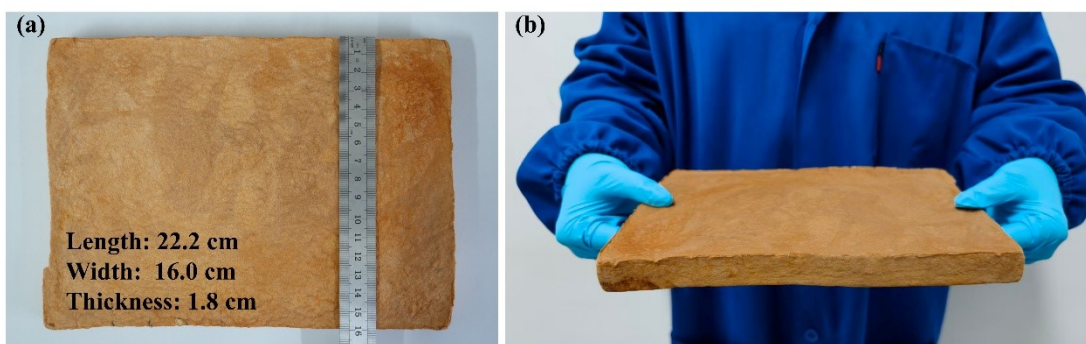

**Fig. S4** Digital photos of BCPA aerogel with 15 wt% CMC content and 100 wt% PA content.

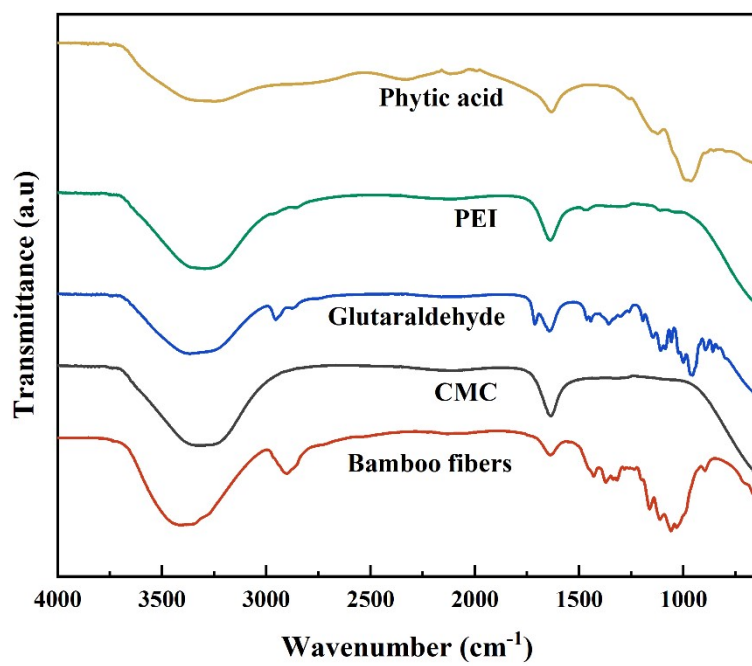

**Fig. S5** FTIR spectra of raw materials in the preparation of BCPA aerogels.

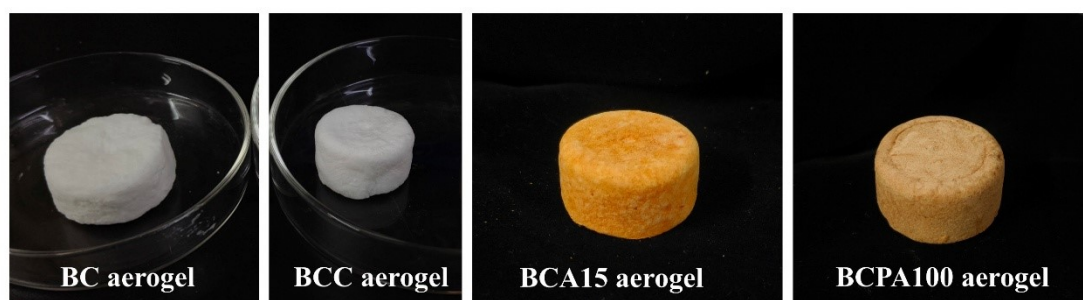

**Fig. S6** Digital photos of BC aerogel, BCC aerogel, BCA15 aerogel and BCPA100 aerogel.

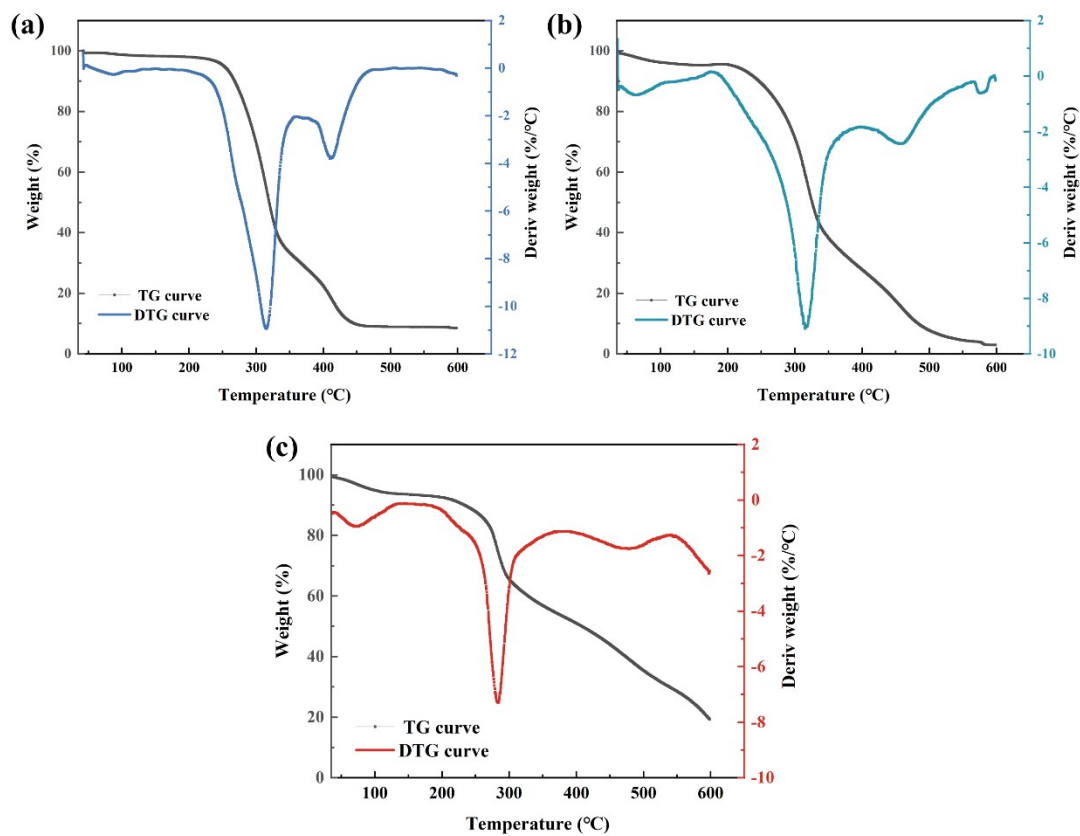

**Fig. S7** TG curves and DTG curves of BCC aerogel (BC/GA/CMC), BCA15 aerogel (BC/GA/CMC/PEI) and BCPA100 (BC/GA/CMC/PEI/PA) aerogel under an oxygen atmosphere.

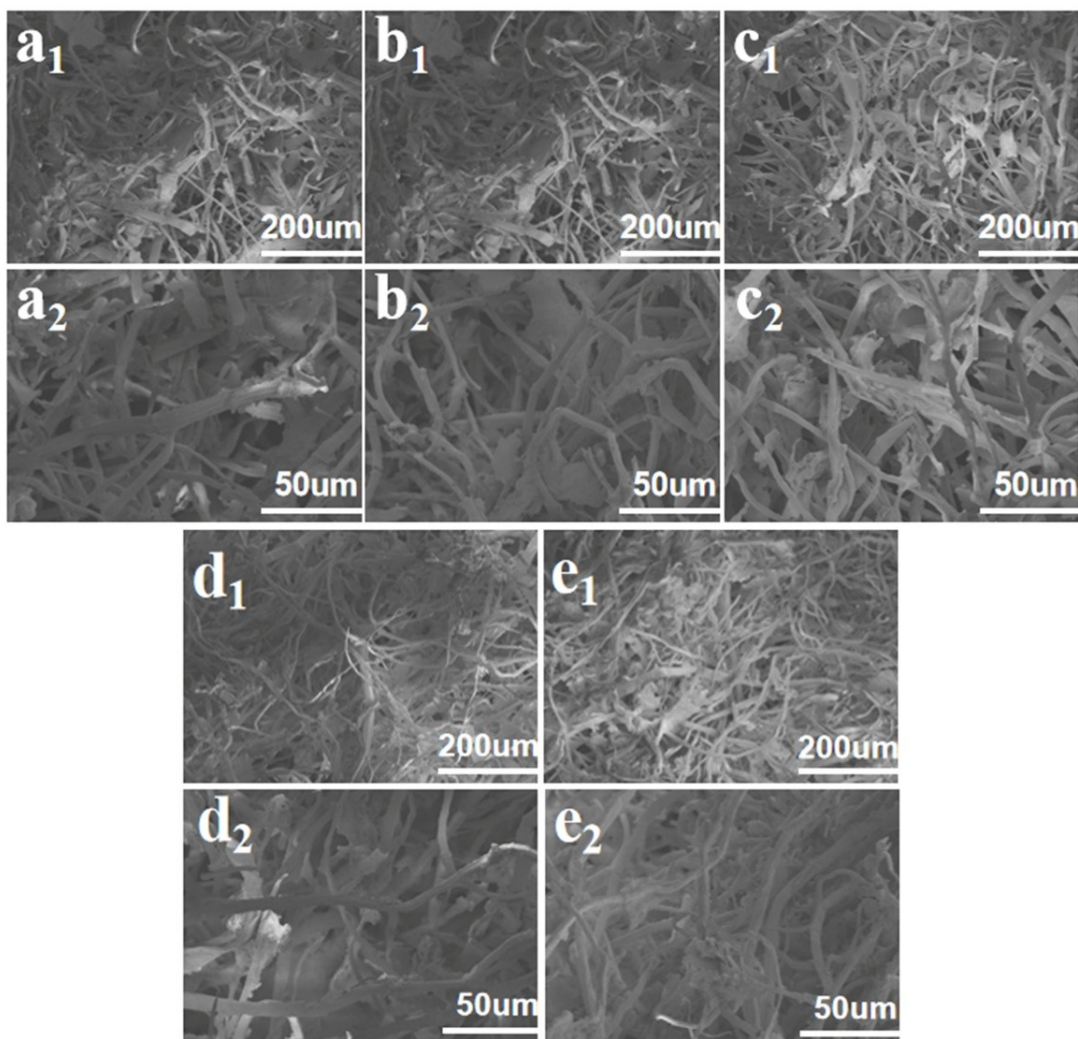

**Fig. S8** SEM images of BCA aerogels with different CMC content. (a and a<sub>1</sub>) 5 wt%, (b and b<sub>1</sub>) 10 wt%, (c and c<sub>1</sub>) 15 wt%, (d and d<sub>1</sub>) 20 wt% and (e and e<sub>1</sub>) 25 wt% at different magnifications.

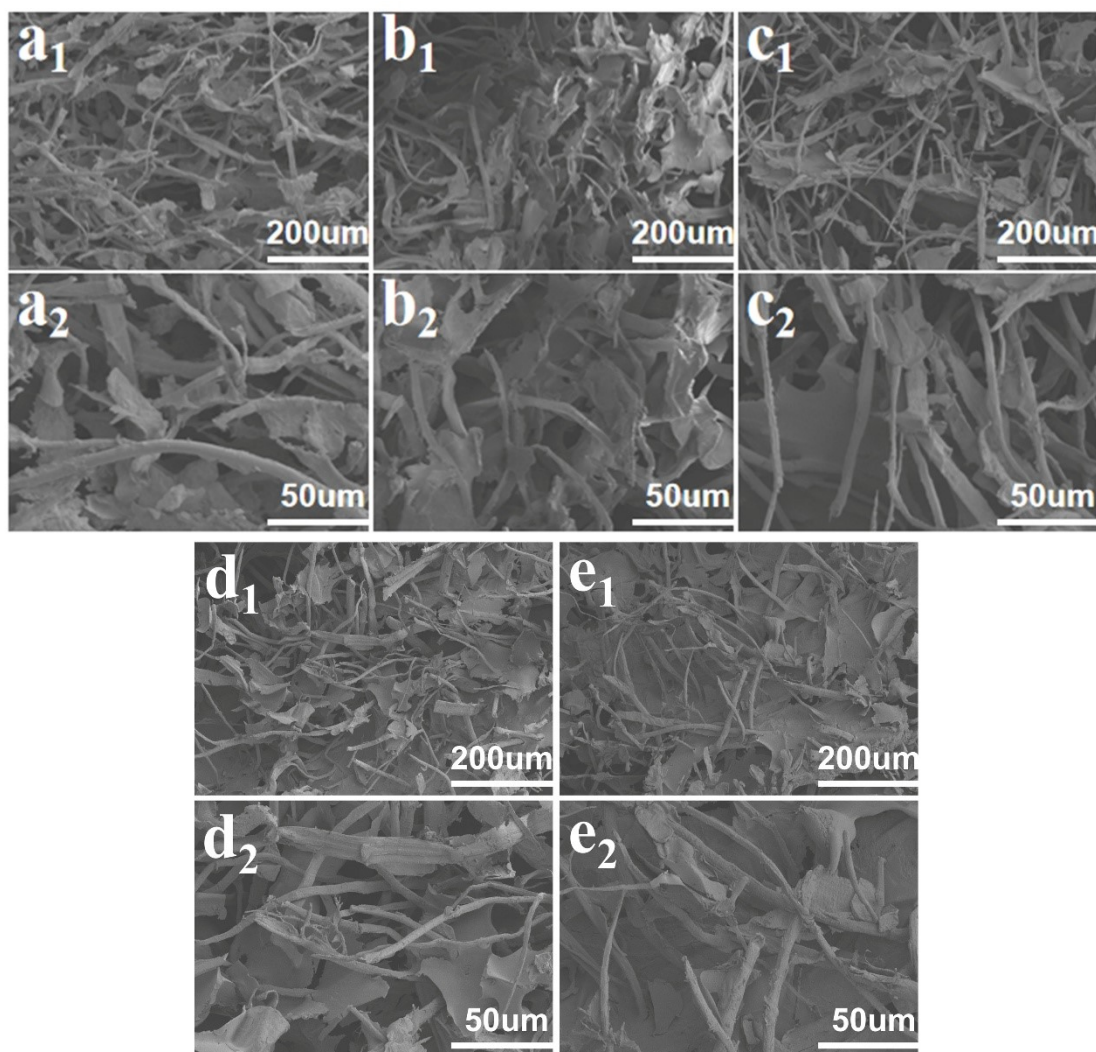

**Fig. S9** SEM images of BCPA aerogels with different PA content. (a and a<sub>1</sub>) 25 wt%, (b and b<sub>1</sub>) 50 wt%, (c and c<sub>1</sub>) 75 wt%, (d and d<sub>1</sub>) 100 wt% and (e and e<sub>1</sub>) 125 wt% at different magnifications.

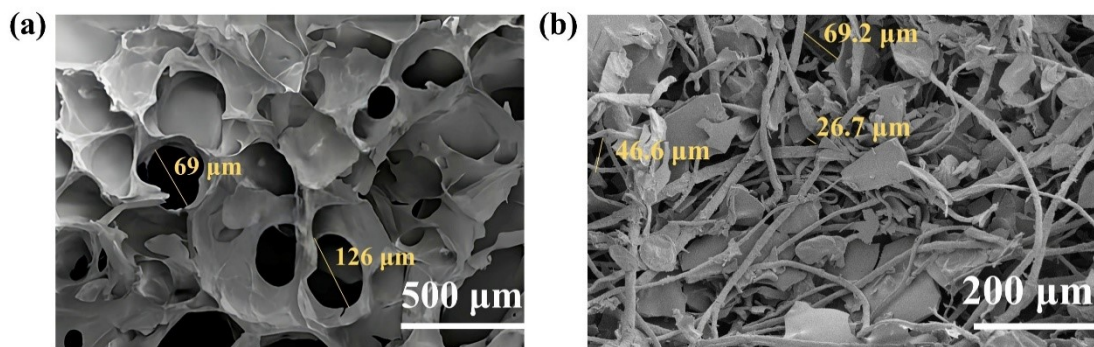

**Fig. S10** (a) SEM images of conventional cellulose aerogel prepared via the dissolution–regeneration route (alkali/urea system followed by sol–gel processing and freeze-drying). (b) SEM images of freeze-dried BCPA100 aerogel.

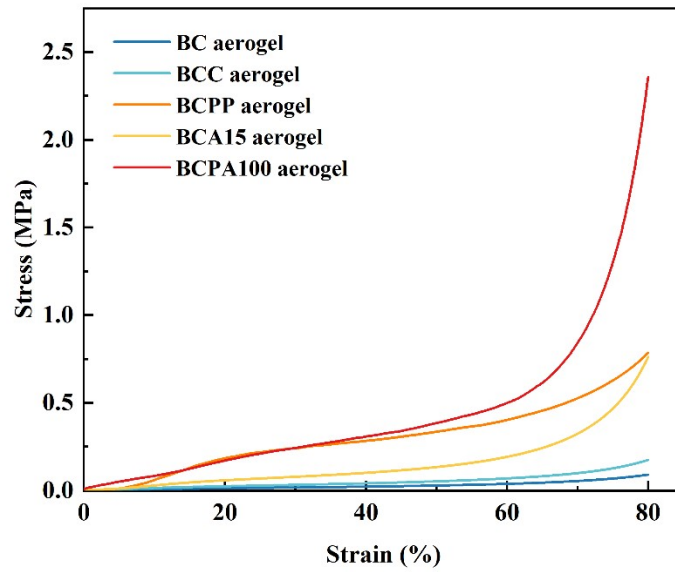

**Fig. S11** Compressive stress-strain curve of BC aerogel (BC/GA), BCC aerogel (BC/GA/CMC), BCPP aerogel (BC/GA/PEI/PA), BCA15 aerogel (BC/GA/CMC/PEI) and BCPA100 aerogel (BC/GA/CMC/PEI/PA).

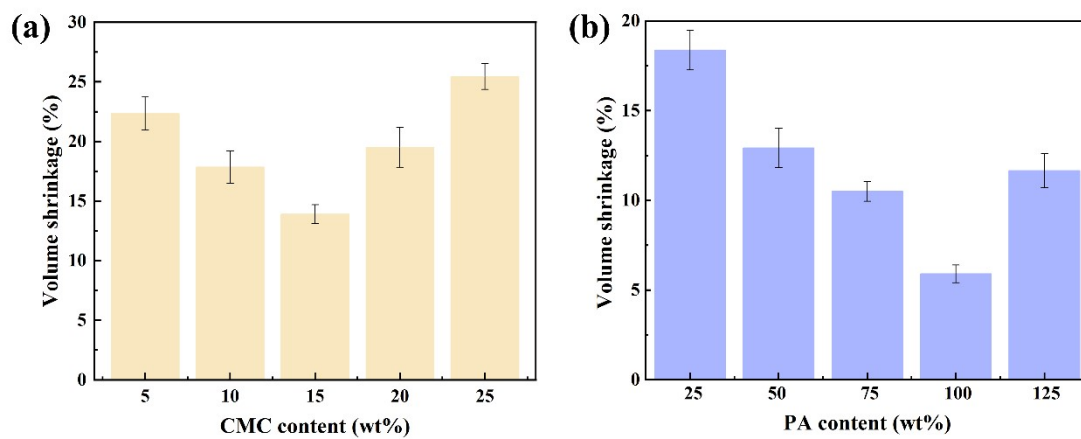

**Fig. S12** The volume shrinkage ratio of BCA aerogels with different CMC content and BCPA aerogels with different PA content.

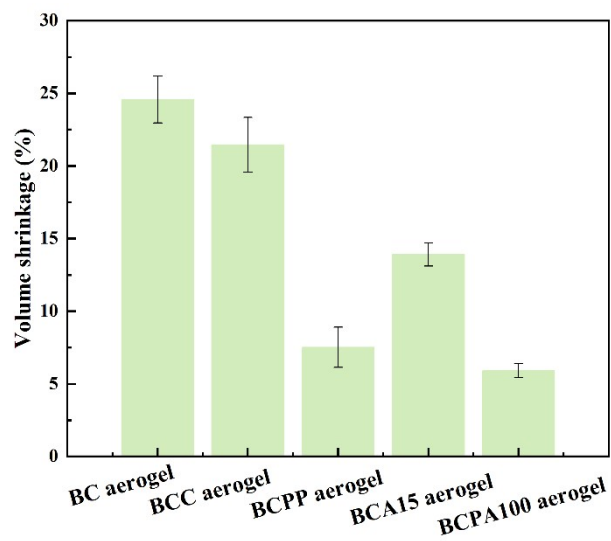

**Fig. S13** Volume shrinkage of BC aerogel, BCC aerogel, BCPP aerogel, BCA15 aerogel and BCPA100 aerogel.

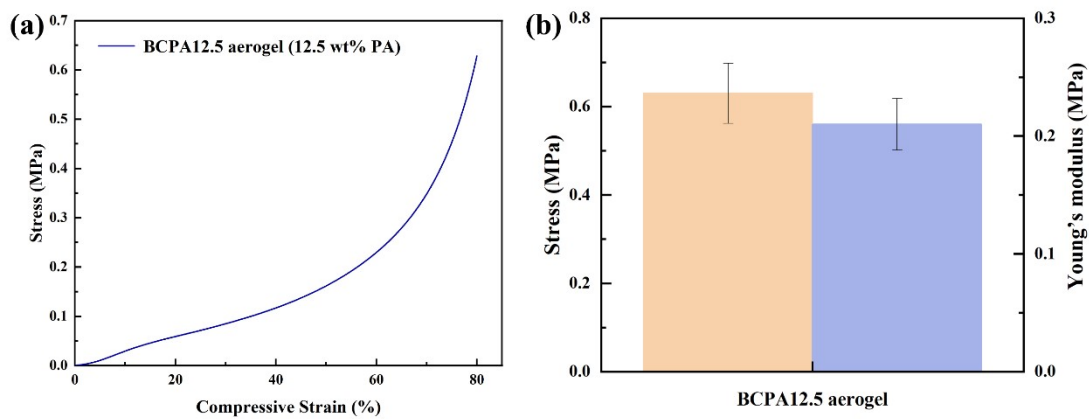

**Fig. S14** Compressive stress-strain curve, compressive stress ( $\epsilon=80\%$ ) and Young's modulus of BCPA12.5 aerogel.

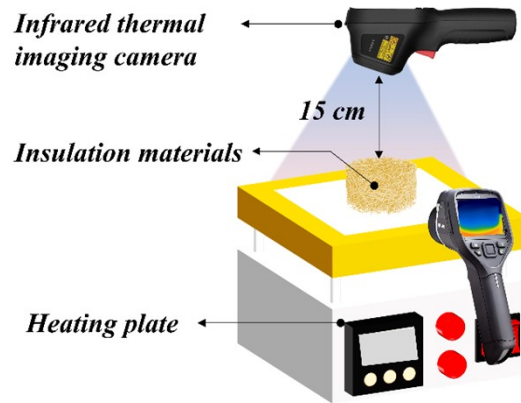

**Fig. S15** Schematic illustration of the thermal insulation testing device when insulation materials were placed on a heating plate.

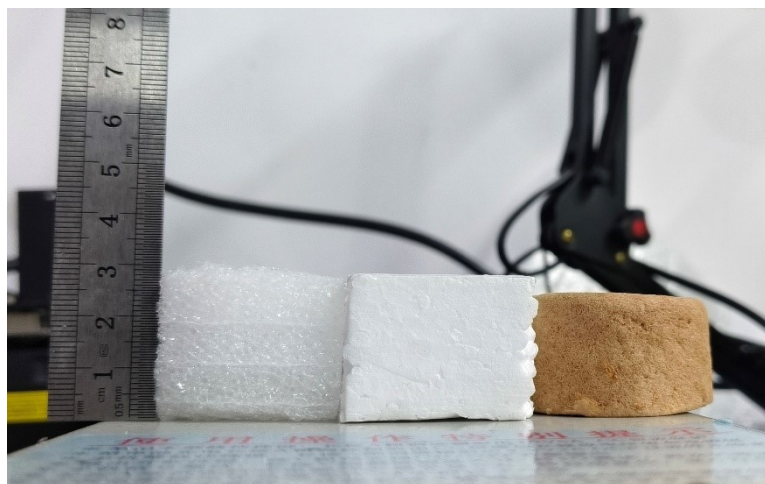

**Fig. S16** Digital photos of EPE foam (left), EPE foam (middle) and BCPA100 aerogel (right) for thermal insulation test.

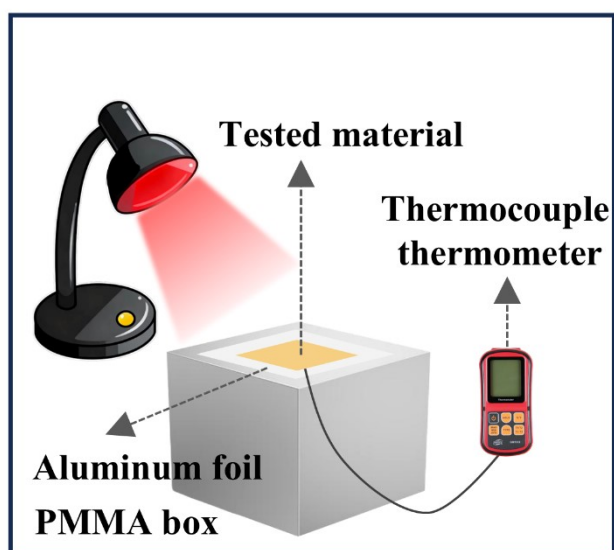

**Fig. S17** Schematic illustration of the thermal insulation testing device for wood board and BCPA100 aerogel.

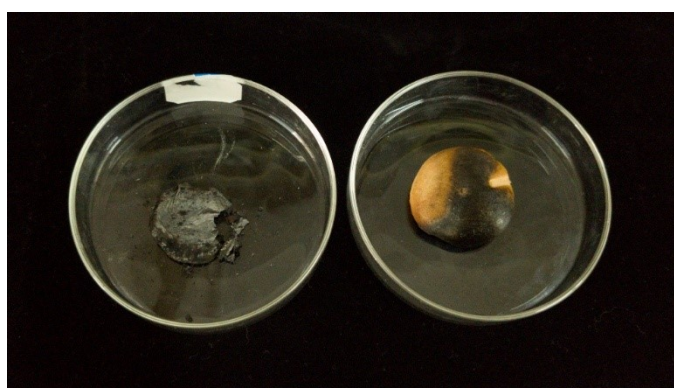

**Fig. S18** Digital photos of BCA15 aerogel (left) and BCPA100 aerogel (right) after burning over an alcohol lamp.

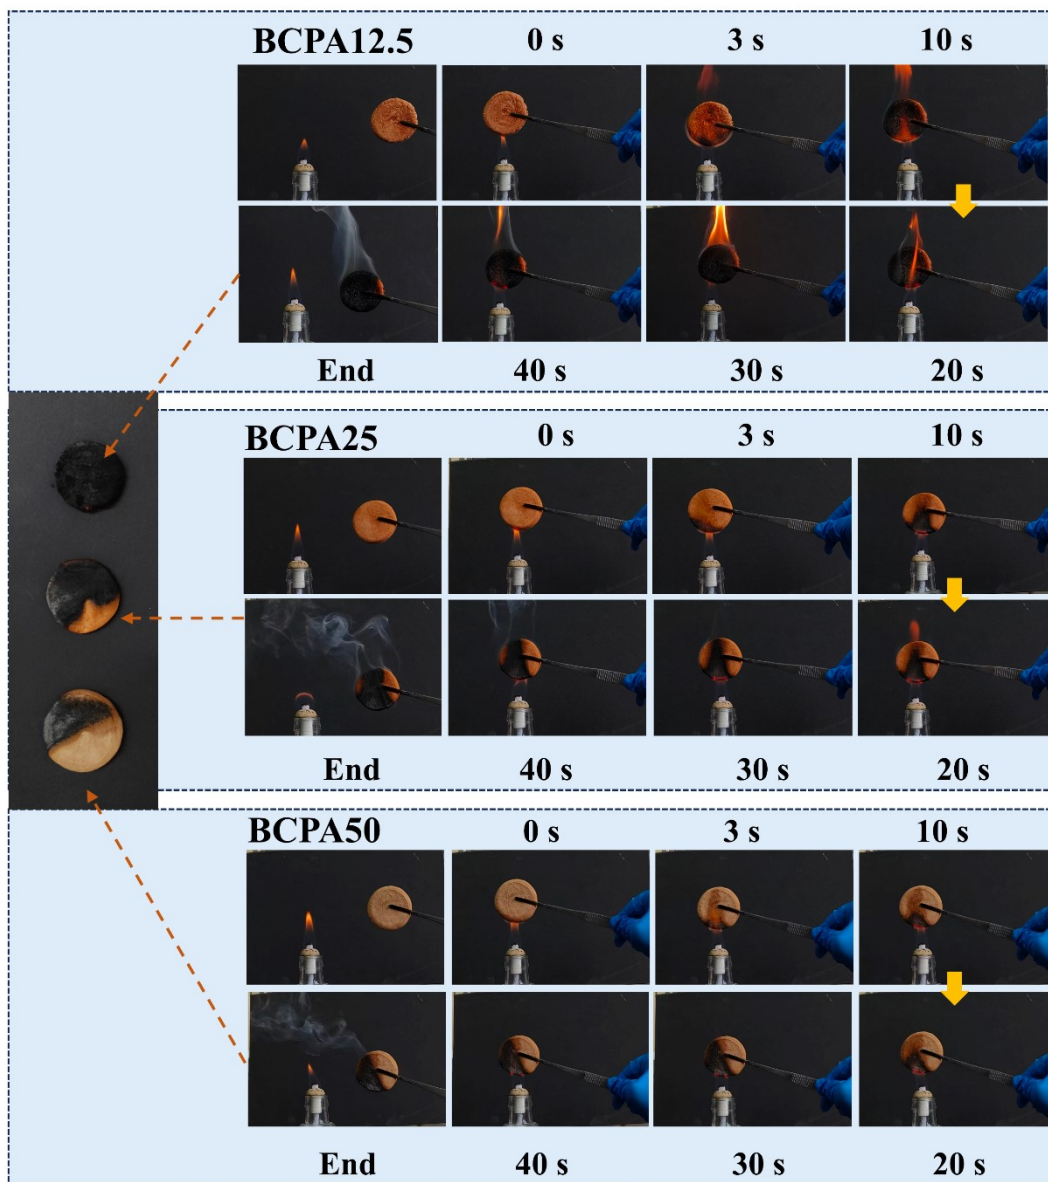

**Fig. S19** Digital photos of BCPA12.5 aerogel, BCPA25 aerogel and BCPA50 aerogel upon exposure to the flame of an alcohol lamp.

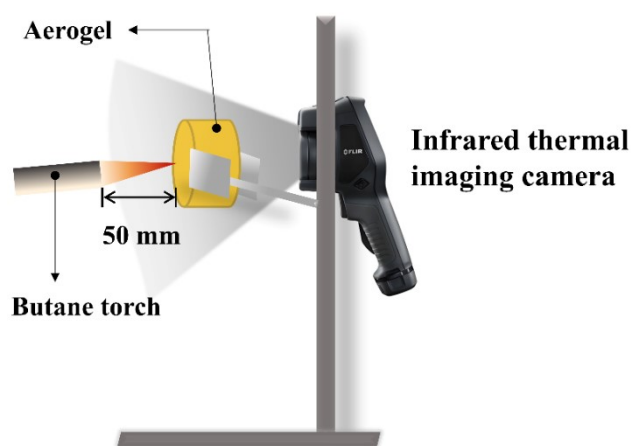

**Fig. S20** Schematic illustration of the flame retardancy testing device for BCPA aerogels fired using by a butane torch ( $\sim 1300$  °C).

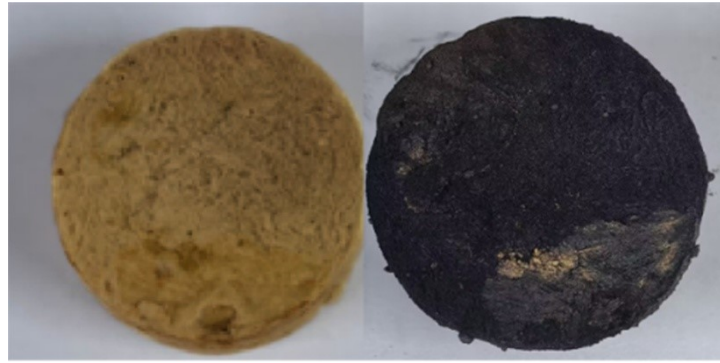

**Fig. S21** Digital photos of BCPA100 aerogel before and after butane torch flame test.

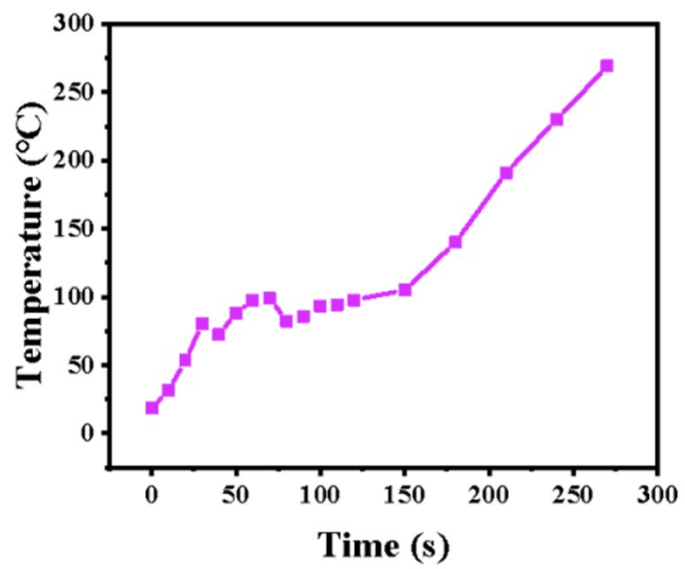

**Fig. S22** Surface temperature variation of BCPA100 aerogel over time during butane torch exposure.

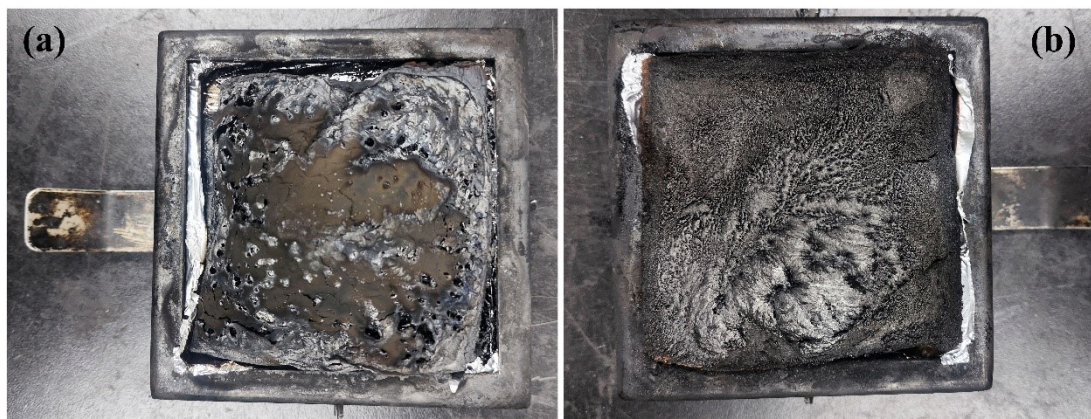

**Fig. S23** Photographs of (a) BCA15 aerogel and (b) BCPA100 aerogel after cone calorimetry test.

**Table S1.** Preparation conditions of BCA aerogels and BCPA aerogels.

| Code    | Cellulose content (wt%) | PEI content (wt%, based on cellulose suspension) | GA content (wt%, based on cellulose suspension) | CMC content (wt%, based on cellulose mass) | Effective PA content (wt%, based on cellulose mass) |
|---------|-------------------------|--------------------------------------------------|-------------------------------------------------|--------------------------------------------|-----------------------------------------------------|
| BCA5    |                         |                                                  |                                                 | 5                                          | 0                                                   |
| BCA10   |                         |                                                  |                                                 | 10                                         | 0                                                   |
| BCA15   | 3                       | 2                                                | 2                                               | 15                                         | 0                                                   |
| BCA20   |                         |                                                  |                                                 | 20                                         | 0                                                   |
| BCA25   |                         |                                                  |                                                 | 25                                         | 0                                                   |
| BCPA25  |                         |                                                  |                                                 | 15                                         | 25                                                  |
| BCPA50  | 3                       | 2                                                | 2                                               | 15                                         | 50                                                  |
| BCPA75  |                         |                                                  |                                                 | 15                                         | 75                                                  |
| BCPA100 |                         |                                                  |                                                 | 15                                         | 100                                                 |

**Table S2.** Preparation conditions of control aerogel samples.

| Code | Cellulose content (wt%) | PEI content (wt%, based on cellulose suspension) | GA content (wt%, based on cellulose suspension) | CMC content (wt%, based on cellulose mass) | Effective PA content (wt%, based on cellulose mass) |
|------|-------------------------|--------------------------------------------------|-------------------------------------------------|--------------------------------------------|-----------------------------------------------------|
| BC   |                         | 0                                                | 2                                               | 0                                          | 0                                                   |
| BCC  | 03                      | 0                                                | 2                                               | 15                                         | 0                                                   |
| BCPP |                         | 2                                                | 2                                               | 0                                          | 100                                                 |

**Table S3.** The key thermal degradation temperatures, maximum decomposition rates and residual weights of BC-GA/CMC aerogel, BCA15 aerogel and BCPA100 aerogel under an oxygen atmosphere.

| Samples           | Tonset (°C) | Tmax (°C) | (dW/dt)max (%/min) | Residual weight (%) |
|-------------------|-------------|-----------|--------------------|---------------------|
| BC-GA/CMC aerogel | 278.0       | 314.7     | -10.95             | 8.46                |
| BCA15 aerogel     | 301.1       | 314.9     | -9.13              | 2.95                |
| BCPA100 aerogel   | 272.0       | 283.3     | -7.29              | 19.19               |

**Table S4.** Preparation and performances comparison of recent reported cellulose aerogels and foams.

| <b>Aerogels/Foams</b>                        | <b>Preparation method</b>                                    | <b>Volume shrinkage (%)</b> | <b>Porosity (%)</b> | <b>Density (g/cm<sup>3</sup>)</b> | <b>Thermal conductivity (W·K<sup>-1</sup>·m<sup>-1</sup>)</b> | <b>Compressive Strength (MPa)</b> | <b>Ref</b>       |
|----------------------------------------------|--------------------------------------------------------------|-----------------------------|---------------------|-----------------------------------|---------------------------------------------------------------|-----------------------------------|------------------|
| Date palm-derived cellulose aerogels         | Cellulose dissolution; freeze-drying                         | NA                          | 94.16-96.31         | 0.055-0.085                       | 0.038-0.074                                                   | 0.5 (50%)                         | [1]              |
| Cellulose/clay composite aerogel             | Vacuum filtration; freeze-drying                             | NA                          | NA                  | 0.14                              | 0.047                                                         | 2.638 (80%)                       | [2]              |
| Bamboo fiber/microfibrillated cellulose foam | Mechanical stirring foaming; ambient drying                  | 27.67                       | NA                  | 0.05-0.12                         | NA                                                            | 0.0227 (60%)                      | [3]              |
| Lignocellulose foam                          | LiOH/urea/H <sub>2</sub> O dissolution system; freeze-drying | NA                          | 94.93               | 0.062                             | 0.046                                                         | 0.2-1.2 (70%)                     | [4]              |
| Cellulose/bentonite foam                     | NaOH/urea dissolution system; ambient drying                 | 8-16                        | 90.92               | 0.09                              | 0.063                                                         | 3.4 (40%)                         | [5]              |
| BCA15 aerogel                                | Schiff base reaction; ambient drying                         | 13.90                       | 95.99               | 0.0578                            | 0.0351                                                        | 0.81 (80%)                        | <b>This work</b> |
| BCPA100 aerogel                              | Schiff base reaction; ambient drying                         | 5.90                        | 94.51               | 0.0818                            | 0.0333                                                        | 2.31 (80%)                        | <b>This work</b> |

## References

- [1] H. Al Abdallah, J. H. Tannous and B. Abu-Jdayil, *Dev. Built Environ.*, 2025, **24**, 100773.
- [2] M. Wang, H. Cao, Z. Huang, Z. Lin, S. Ye, Y. Li, Y. Hua, Z. Wei and Y. Zhao, *Compos. Part B Eng.*, 2026, **309**, 113098.
- [3] Y. Feng, Y. Yu, T. Xi, L. Chen, X. Wang, T. Xu, H. Xiao, Z. Wang, H. Dai and H. Bian, *Adv. Funct. Mater.*, 2025, **36**, e14273.
- [4] H. Dong, S. Wei, W. Chen, B. Lu, Z. Cai, B. Yang, X. Li and X. Li, *ACS Nano*, 2025, **19**, 11712–11727.
- [5] L. Chen, S. Wang, S. Wang, C. Chen, L. Qi, L. Yu, Z. Lu, J. Huang, J. Chen, Z. Wang, X. Shi, Z. Song, H. Liu and C. Chen, *ACS Nano*, 2022, **16**, 16414–16425.
